# Supplementary material for: Individual and Combined In Vitro Effects of Deoxynivalenol and Zearalenone on Boar Semen
Source: PubMed Central journal article supplement (PMC7472223; doi:10.3390/toxins12080495), 2020-08-01
Supplement: toxins-12-00495-s001.pdf [file toxins-12-00495-s001.pdf]

## Supplementary Materials: Individual and Combined In Vitro Effects of Deoxynivalenol and Zearalenone on Boar Semen

Panagiotis D. Tassis, Ioannis A. Tsakmakidis, Veronika Nagl, Nicole Reisinger, Eleni Tzika, Christiane Gruber-Dorninger, Ilias Michos, Nikolaos Mittas, Athina Basioura and Dian Schatzmayr

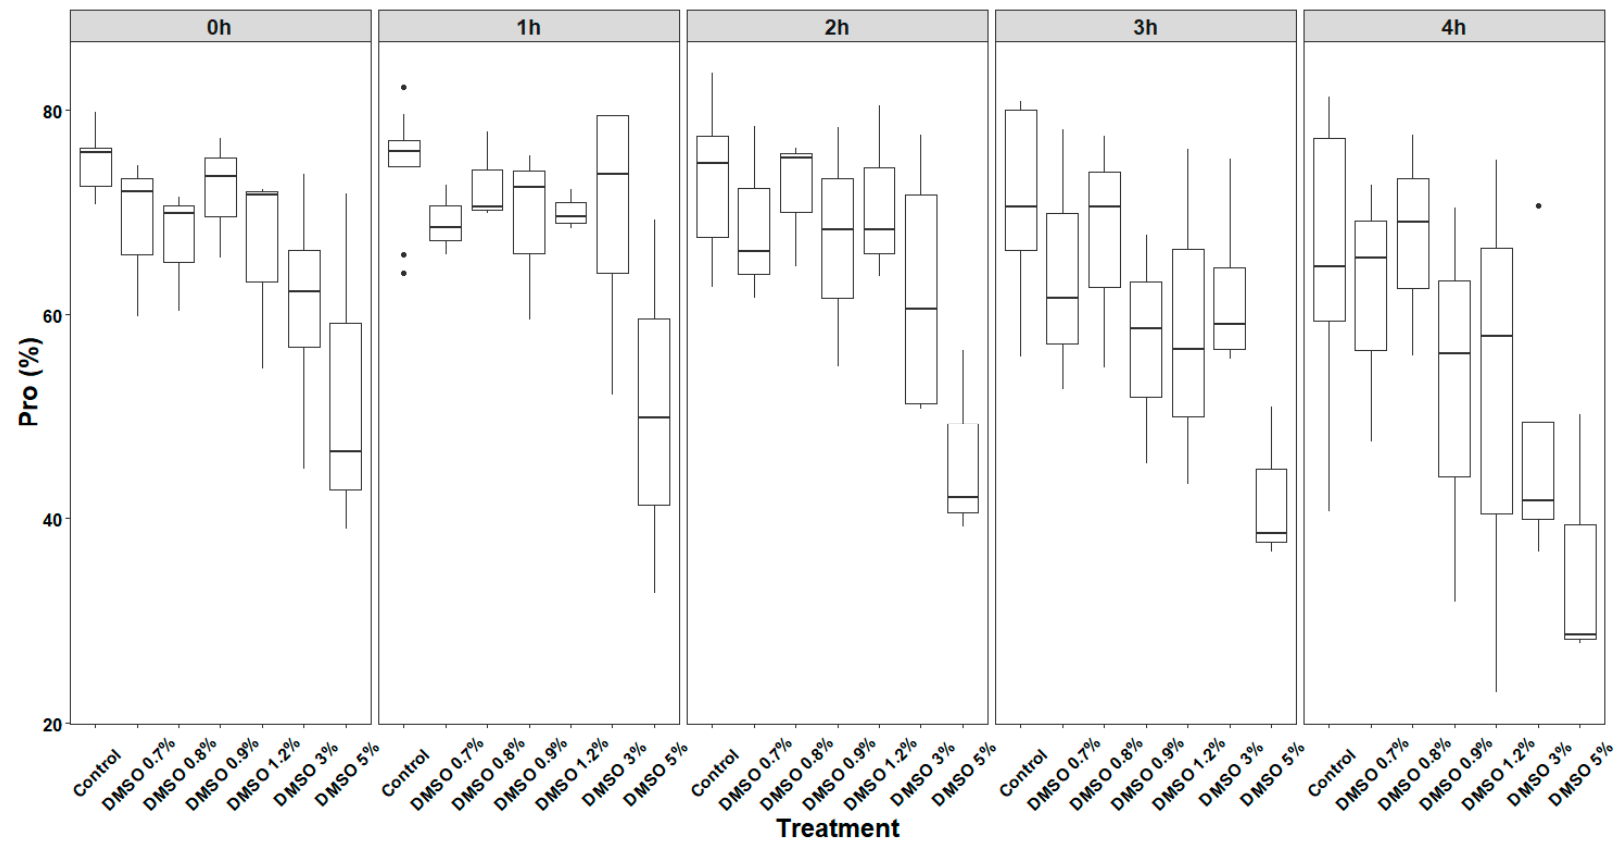

**Figure S1.** Distribution of progressive motility values for control and DMSO concentrations per hour (0–4 h) of evaluation ( $n = 5$ ). DMSO concentrations (v/v) used were 0.7%, 0.8%, 0.9%, 1.2%, 3%, and 5%.

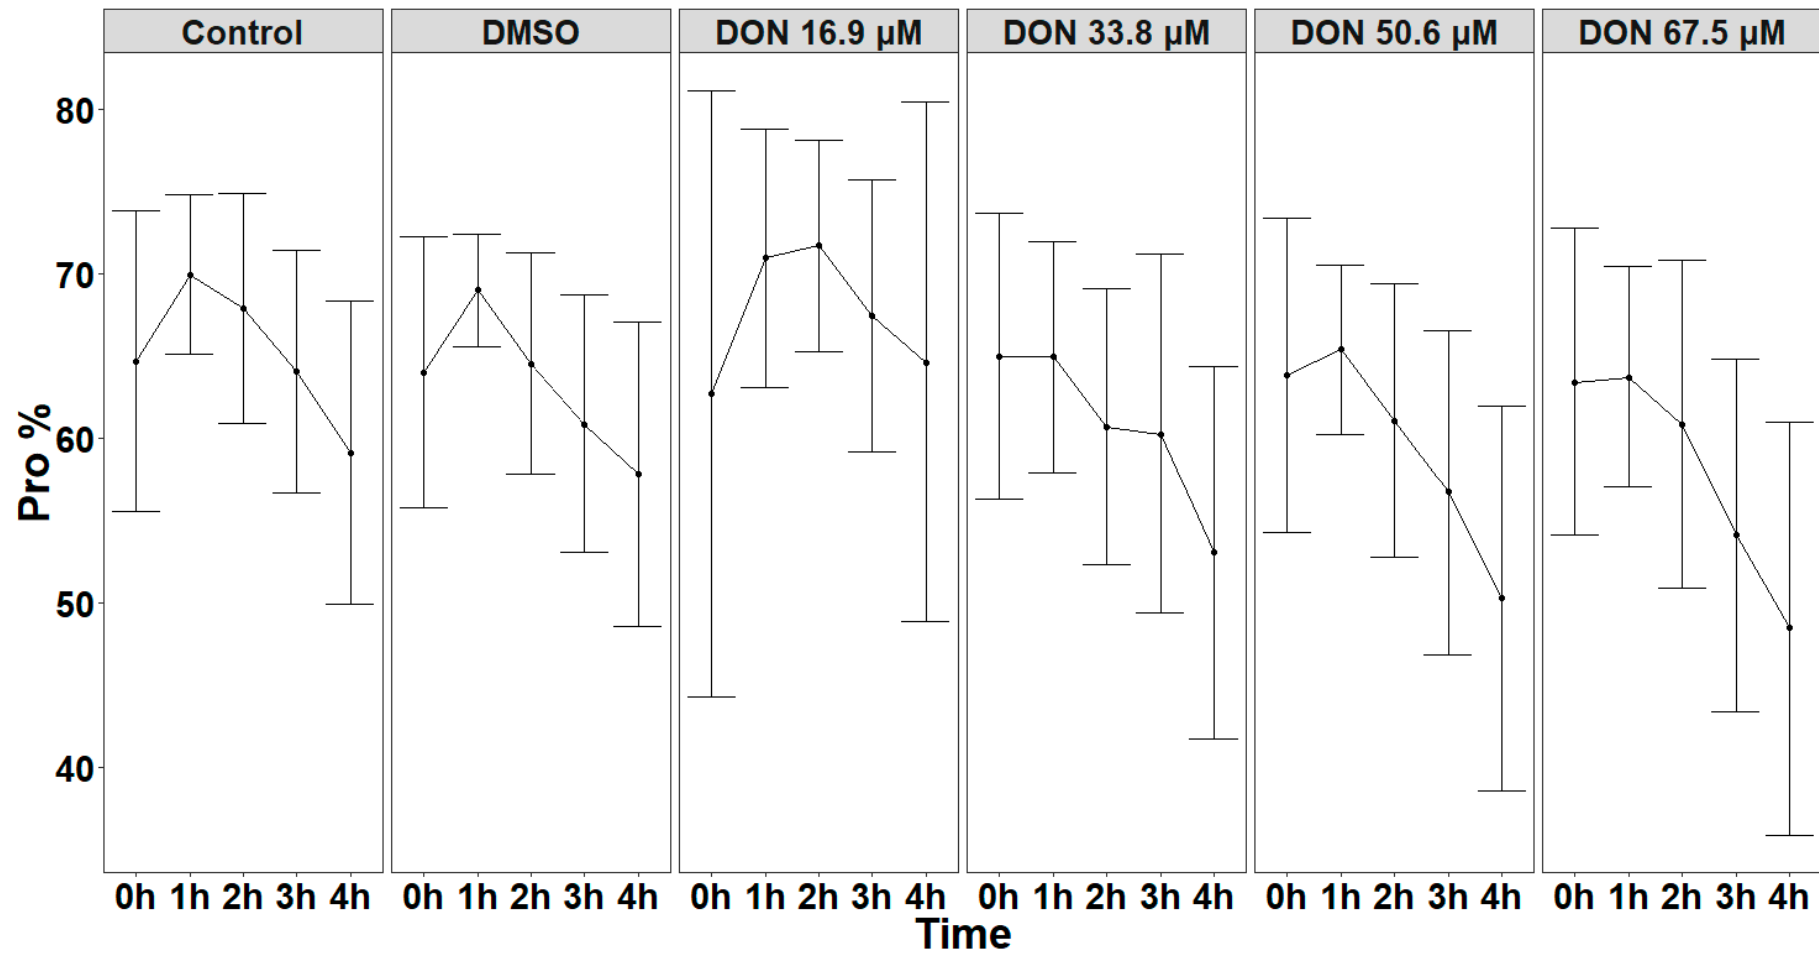

**Figure S2.** Tests' distribution of progressive motility (Pro) mean values of DON-treated extended boar semen per hour of investigation (0–4 h). DMSO concentration (v/v) used was 0.7% in all groups, except for the control ( $n = 5$ ). Presented DON treatments were: 16.9 μM, 33.8 μM, 50.6 μM, and 67.5 μM.

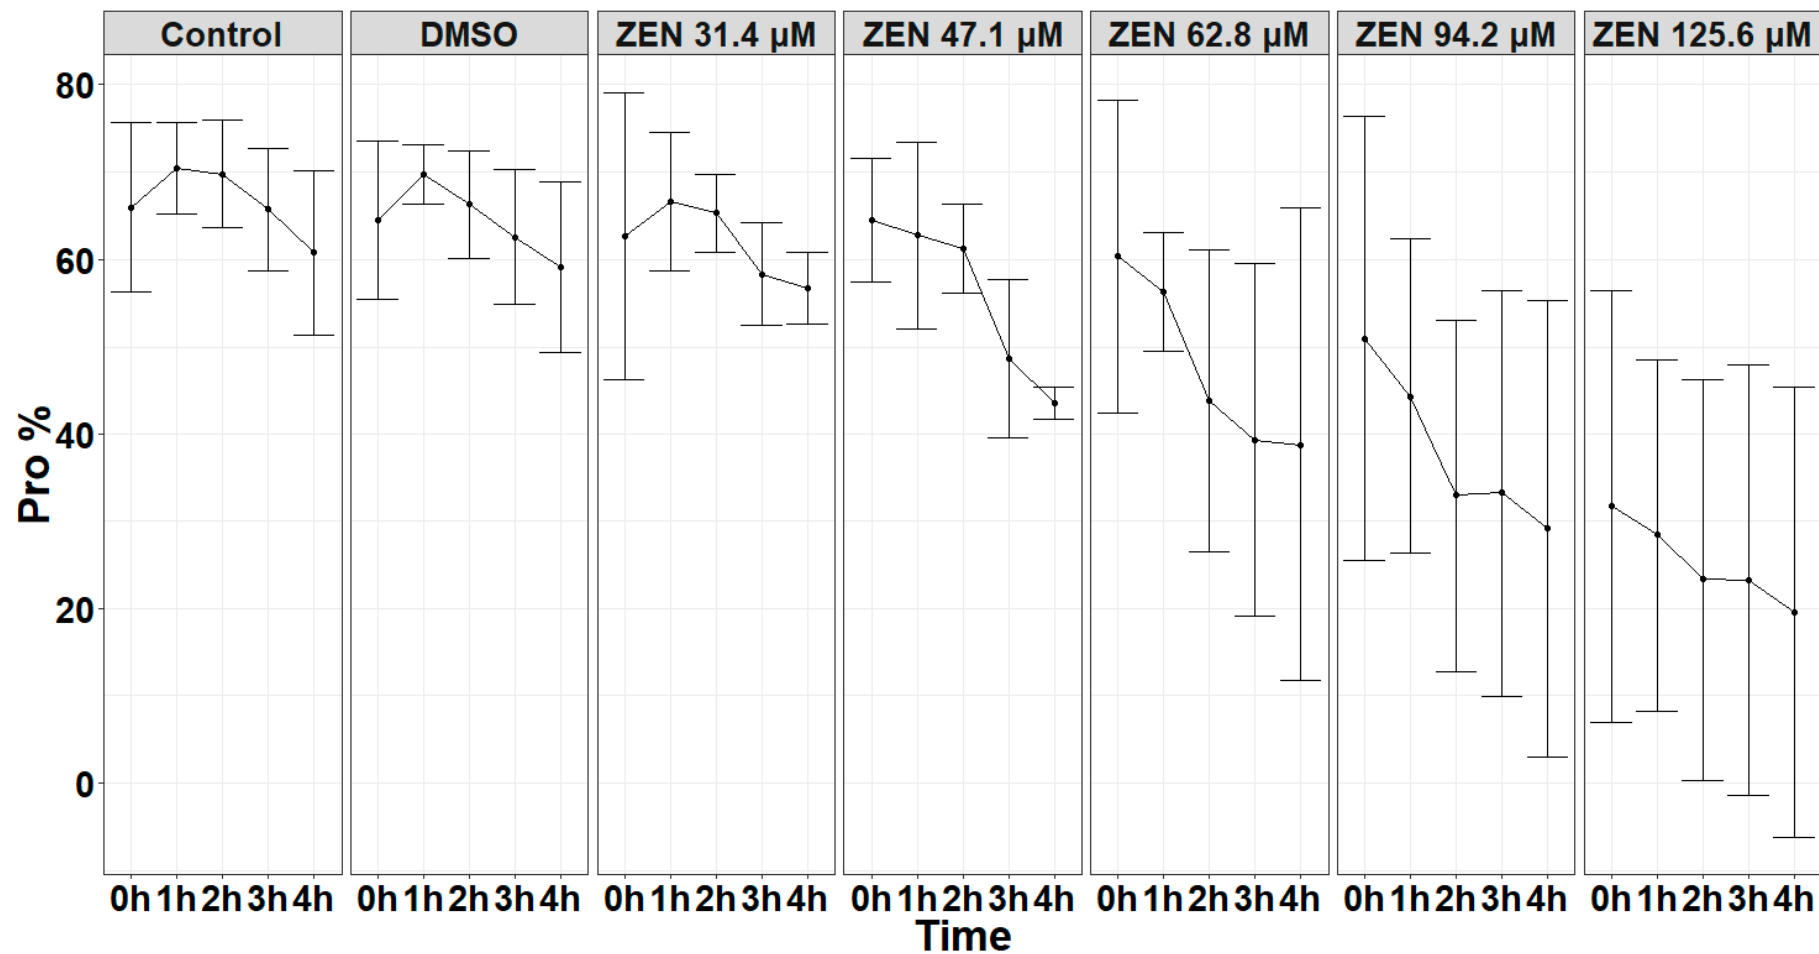

**Figure S3.** Pretrial tests' distribution of progressive motility (Pro) mean values of ZEN-treated extended boar semen per hour of investigation (0-4 h). DMSO concentration (v/v) used was 0.7% in all groups, except for the control ( $n = 5$ ). Presented ZEN treatments are: 31.4  $\mu\text{M}$ , 47.1  $\mu\text{M}$ , 62.8  $\mu\text{M}$ , 94.2  $\mu\text{M}$ , and 125.6  $\mu\text{M}$ .

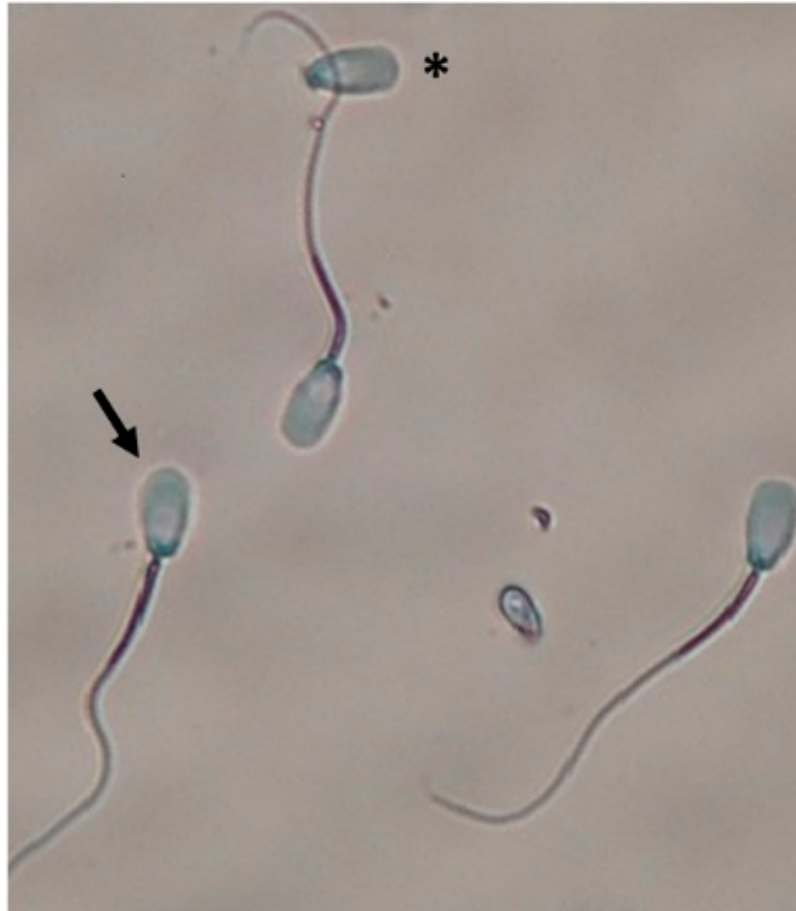

**Figure S4.** Morphology evaluated by SpermBlue staining method ( $\times 400$ ). Spermatozoon (ZEN group, 4 h) without tail (marked with \*), swelling acrosome (marked with an arrow).

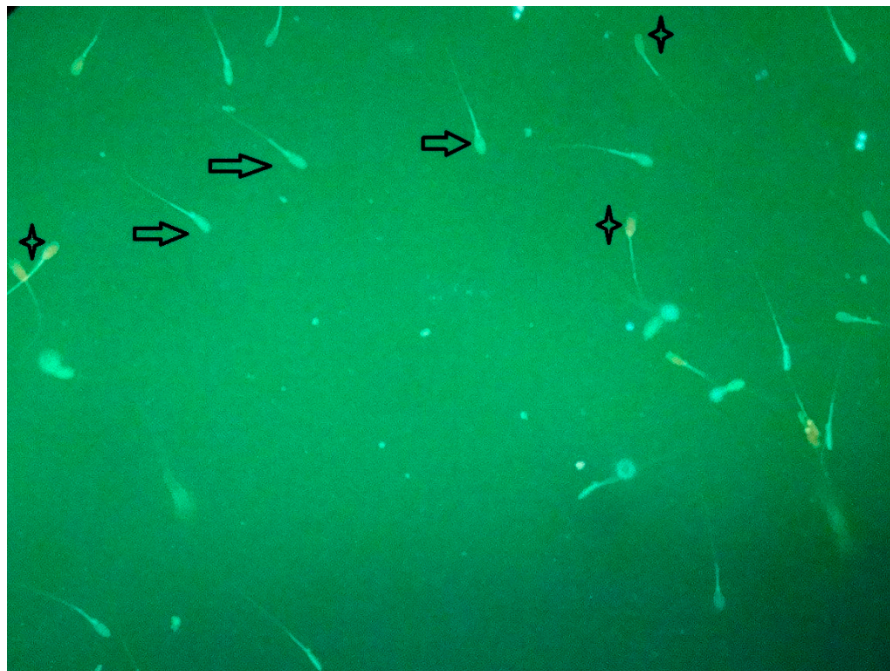

**Figure S5.** Double fluorescent stain calcein-AM and propidium iodide ( $\times 200$ ). Spermatozoa with intact plasma membrane fluoresce green (arrow), whereas the dead sperms fluoresce red (star sign) (ZEN group, 4 h).

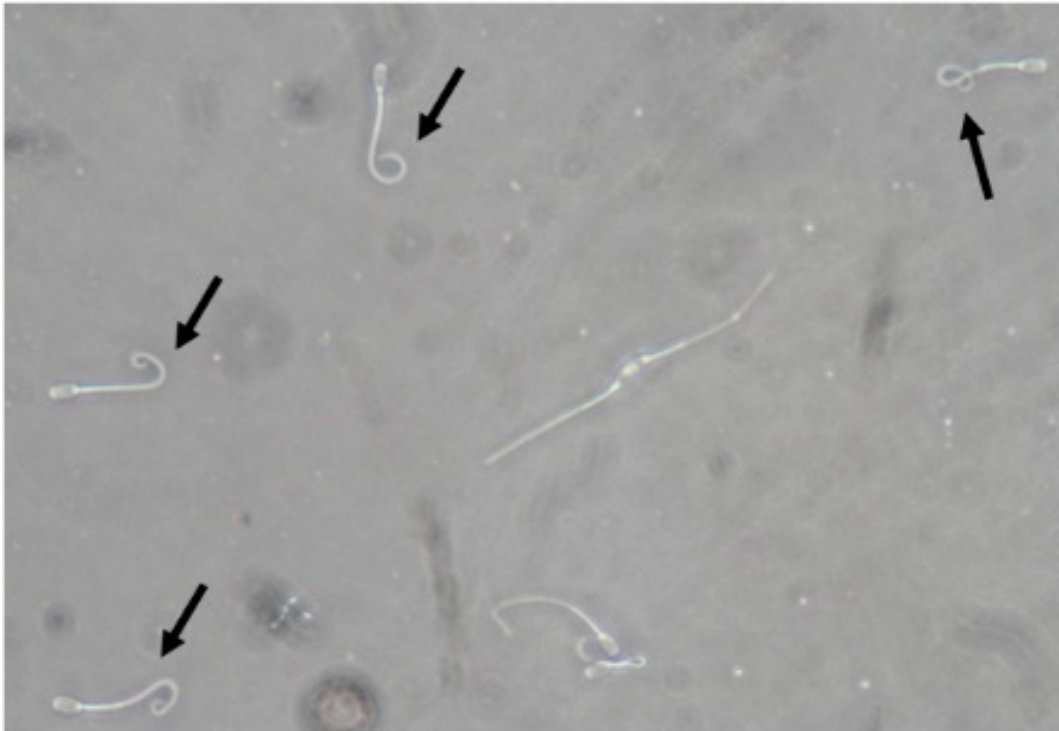

**Figure S6.** Hypo-osmotic swelling test (HOST) ( $\times 200$ ), plasma membrane functional spermatozoa provide swollen-coiled tails (marked with an arrow) (ZEN group, 4 h).

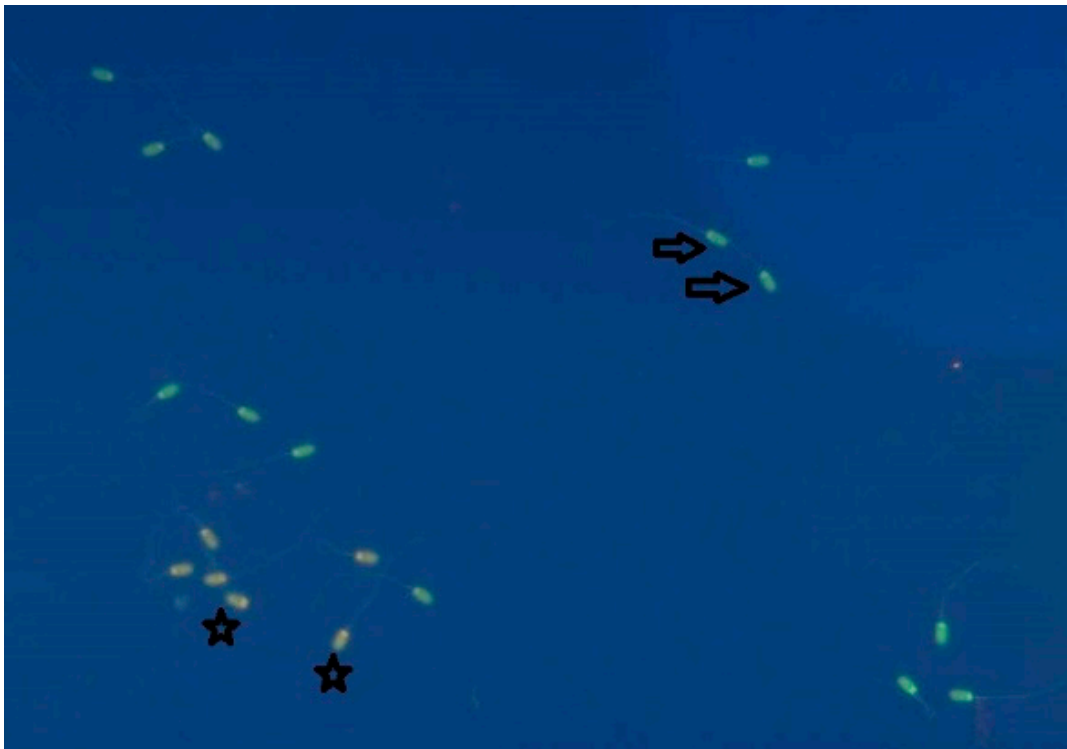

**Figure S7.** Acridine orange (AO) staining ( $\times 100$ ). Normal spermatozoa with compact chromatin structure fluoresce green (arrow), whilst damaged spermatozoa with de-compacted chromatin (single-stranded DNA) fluoresce red (star sign) (DON + ZEN group, 4 h).

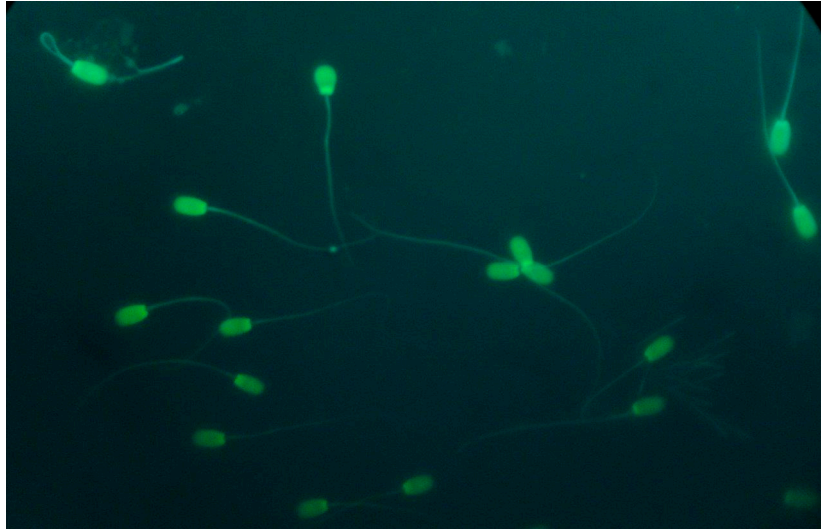

**Figure S8.** Acridine orange (AO) staining ( $\times 200$ ). Semen sample with normal spermatozoa with compact chromatin structure fluoresce green (DMSO group, 0 h).
